# Supplementary material for: Public Health and Economic Benefits of Influenza Vaccination of the Population Aged 50 to 59 Years without Risk Factors for Influenza Complications in Mexico: A Cross-Sectional Epidemiological Study
Source: MDPI journal article supplement (doi:10.3390/vaccines9030188), 2021-02-24
Supplement: s1 [file s1]

---

## Supplementary File

### **Public health and economic benefits of influenza vaccination of the population aged 50 to 59 years without risk factors for influenza complications in Mexico: a cross-sectional epidemiological study**

Miguel Betancourt-Cravioto<sup>1</sup>, Jorge Abelardo Falcón-Lezama<sup>1</sup>, Rodrigo Saucedo-Martínez<sup>1</sup>, Myrna María Alfaro-Cortes<sup>1</sup>, Roberto Tapia-Conyer<sup>1,2</sup>

<sup>1</sup>Sociedad Mexicana de Salud Pública, Herschel 109, Anzures, Miguel Hidalgo, 11590 Mexico City, Mexico

<sup>2</sup>Universidad Nacional Autónoma de México, Av. Universidad 3000, Circuito Escolar CU, Edificio B 1er Piso, Coyoacan, 04510 Mexico City, Mexico

#### **Corresponding author:**

Roberto Tapia-Conyer

Lago Zurich 245, Presa Falcon Floor 20, Col. Ampliacion Granada, Miguel Hidalgo, 11529 Mexico City, Mexico

Tel: +52 (55) 5339 1796

Email: [tapiaconyer@yahoo.com.mx](mailto:tapiaconyer@yahoo.com.mx)

---

## Supplement 1

### Text S1. Methodology for calculation of national estimates

#### Main characteristics of SISVEFLU

The SISVEFLU (Influenza Epidemiologic Surveillance System) was developed by the General Directorate of Epidemiology of Mexico's Ministry of Health with the objective of collecting epidemiologic data about trends in circulating strains of influenza virus, as well as other causative agents of severe acute respiratory infection (SARI) [27].

The SISVEFLU system operates through monitoring health facilities that were selected for convenience. Because of this, the collected data are not considered to be representative of the population. Facilities, both primary health care clinics and hospitals, must comply with at least one of the following criteria:

- They must be willing to be part of the SISVEFLU.
- They serve a relatively large population.
- They have adequate medical staff sufficiently specialized to diagnose, clinically manage, and report influenza cases.
- They have, or have access to, a high-quality diagnostic laboratory.

#### Burden of disease estimation

SISVEFLU's ultimate goal is to identify and confirm influenza cases and trends, as well as deaths, attributed to both influenza and other SARIs. According to the epidemiological surveillance

guidelines, sample collection for confirmation is considered in only 10% of cases in primary health care facilities, whereas in secondary and tertiary health care facilities, samples must be submitted for confirmation in 100% of cases. In light of this, reporting of cases from primary care clinics may be underestimated compared with that reported from hospitals. Unlike primary care clinics, hospitals do not have a defined population because they receive cases from different geographical areas. Thus, information from these facilities cannot be extrapolated. According to the World Health Organization's methodology to estimate burden of disease due to influenza, data extrapolation from the SISVEFLU is limited because it is not representative of the population. Moreover, as noted from the data collected and reported in the article, most type B influenza cases did not have lineage analysis; therefore, data cannot be extrapolated for either the Victoria or Yamagata lineages.

As an alternative, we used the standardized influenza incidence data for the United States, estimated by the Centers for Disease Control and Prevention (CDC) for the same seasons (**Table S1.1**). We chose the United States because it is in the Northern Hemisphere and shares viral circulation with Mexico. The use of surrogate data for indirect standardization is epidemiologically accepted when local data are not available, provided there is reasonable justification. High-quality data regarding the incidence of influenza in the US were available from the CDC. Furthermore, health authorities in both the US and Mexico recognize that infectious disease dynamics, particularly for those transmitted via person-to-person, exhibit similar epidemiological behavior in both countries [51], which may be attributable to the high frequency of migration between the two countries. Ret-

rospective analyses of data from the 2009 influenza pandemic have shown that the identified origins occurred nearly simultaneously in Mexico and the US [52], providing further support for the use of surrogate data. In the last decade, the timing and viral type patterns have been very similar regarding the general epidemiological behavior of infectious diseases [53]. The US and Mexico share a border in the same hemisphere and the fact that similar epidemiological behavior of disease is documented in both countries supports the use of CDC (US) data as the best available source for influenza incidence estimation in Mexico.

**Table S1.2** shows national estimates obtained by indirectly standardizing CDC estimates to the population of Mexico, taking the same age groups into consideration. For this exercise, data on Mexican population projections for the study period were obtained from the National Population Council database at the beginning of each year [26]. Data regarding state estimates are available upon request.

**Table S1.1.** Influenza cases per 100,000 people in the United States by age group [33]

| Season                 | 0–4 years | 5–17 years | 18–49 years | 50–64 years | ≥65 years |
|------------------------|-----------|------------|-------------|-------------|-----------|
| 2010–2011              | 13,743.20 | 8216.60    | 5468.10     | 8240.50     | 4521.10   |
| 2011–2012              | 4697.10   | 3711.80    | 2564.20     | 3181.40     | 2333.60   |
| 2012–2013              | 17,820.50 | 12,419.20  | 8383.60     | 12,852.10   | 9712.10   |
| 2013–2014              | 12,711.70 | 7416.10    | 9589.60     | 13,712.90   | 3819.30   |
| 2014–2015              | 16,135.90 | 11,895.00  | 6310.30     | 11,626.40   | 10,120.20 |
| 2015–2016              | 11,498.70 | 8094.10    | 7390.70     | 11,200.80   | 3460.60   |
| 2016–2017              | 11,478.30 | 11,083.30  | 6227.90     | 13,654.80   | 9013.80   |
| 2017–2018              | 19,983.70 | 13,985.60  | 10,469.70   | 24,588.10   | 14,371.40 |
| 2018–2019 <sup>1</sup> | 13,508.64 | 9602.71    | 7050.51     | 12,382.13   | 7169.01   |

<sup>1</sup>Incidence for season 2018–2019 was estimated for each age group as the average of seasons 2010–2011 to 2017–2018.

**Table S1.2.** Estimation of influenza cases in Mexico

| Season       | Population  | Estimated Cases   | Cases<br>per 100,000 |
|--------------|-------------|-------------------|----------------------|
| 2010–2011    | 114,551,762 | 8,275,119         | 7223.91              |
| 2011–2012    | 116,179,714 | 3,616,140         | 3112.54              |
| 2012–2013    | 117,668,241 | 12,803,672        | 10,881.16            |
| 2013–2014    | 119,216,240 | 11,281,198        | 9462.80              |
| 2014–2015    | 120,653,293 | 11,413,739        | 9459.95              |
| 2015–2016    | 122,038,924 | 9,928,898         | 8135.85              |
| 2016–2017    | 123,388,022 | 11,074,556        | 8975.39              |
| 2017–2018    | 124,692,044 | 17,749,078        | 14,234.33            |
| 2018–2019    | 125,960,168 | 11,223,972        | 8910.73              |
| <b>TOTAL</b> |             | <b>97,366,372</b> |                      |

## Supplement 2

### *Text S2. Methodology for the estimation of the different scenarios*

#### **Number of cases of influenza registered in SISVEFLU**

The SISVEFLU (Influenza Epidemiologic Surveillance System) was developed by the General Directorate of Epidemiology of Mexico's Ministry of Health with the objective of collecting epidemiologic data about trends in circulating strains of influenza virus, as well as other causative agents of severe acute respiratory infection (SARI) [27].

From seasons 2009–2010 to 2017–2018, health monitoring units registered 50,900 confirmed cases of influenza, of which 5725 were of people aged 50 to 59 years. These cases were distributed between the different institutions of Mexico's Health System as shown in **Table S2.1**.

Estimated cases were then allocated into eight different scenarios, considering 1) the probability of not demanding medical care (scenario 0), as reported by Molinari et al. for different age groups [34], 2) where cases were diagnosed according to the SISVEFLU database (outpatient clinic or hospital), and 3) likelihood of occurrence of health outcome (ambulatory discharge, hospitalization and subsequent discharge, or death).

Regarding the decision analytics used for the present study, we followed the method of Molinari et al. for cases from scenario 0 (symptomatic individuals who do not seek medical care) and considered the likelihood (0.6664) of seeking medical care for patients with low risk [34]. For estimation of cases for scenarios either from ambulatory or inpatient care that do not end in death (1, 2, 4, 5, and 6), the likelihood of each scenario was calculated considering data registered from health monitoring units at SISVEFLU. Within this database, there is a variable named “Evolution” where health professionals from monitoring units register, for each case, the code that corresponds to the health outcome of that case. **Table S2.2** shows the different codes that were found in the database, and the scenario to which they were allocated. For scenarios either from ambulatory or inpatient care that resulted in death (3 and 7), the number of deaths was obtained directly from SISVEFLU. Hence, following this classification, all 5725 cases were allocated to a single scenario, and based on the date of each case, they were allocated to one season from 2009–2010 to 2017–2018. Based on that, the likelihood of occurrence of each scenario for a typical influenza season was estimated, and these likelihoods were used to project national estimates of influenza. **Table S2.3** shows classification of cases for each of the SISVEFLU codes previously described. Cases were then allocated to its corresponding season based on date of occurrence (**Table S2.4**).

**Table S2.1.** Confirmed cases of influenza per season and institution, population aged 50 to 59 years

| Institution        | 2009-2010  | 2010-2011  | 2011-2012  | 2012-2013  | 2013-2014   | 2014-2015  | 2015-2016   | 2016-2017  | 2017-2018  | 2018-2019 | TOTAL PER INSTITUTION |
|--------------------|------------|------------|------------|------------|-------------|------------|-------------|------------|------------|-----------|-----------------------|
| SSA                | 128        | 151        | 426        | 176        | 582         | 153        | 568         | 322        | 185        | 20        | 2711                  |
| IMSS               | 93         | 127        | 212        | 112        | 461         | 142        | 456         | 380        | 188        | 30        | 2201                  |
| ISSSTE             | 18         | 6          | 63         | 14         | 158         | 21         | 125         | 104        | 48         | 5         | 562                   |
| IMSS-OPORTUNIDADES | 0          | 1          | 3          | 2          | 7           | 1          | 9           | 2          | 3          | 1         | 29                    |
| PEMEX              | 3          | 5          | 1          | 0          | 4           | 2          | 2           | 7          | 3          | 0         | 27                    |
| SEDENA             | 0          | 0          | 1          | 0          | 0           | 0          | 0           | 0          | 0          | 0         | 1                     |
| SEMAR              | 0          | 0          | 0          | 0          | 0           | 0          | 0           | 0          | 0          | 0         | 0                     |
| DIF                | 0          | 0          | 0          | 0          | 0           | 0          | 0           | 0          | 0          | 0         | 0                     |
| STATE              | 0          | 0          | 9          | 1          | 5           | 5          | 23          | 8          | 4          | 1         | 56                    |
| UNIVERSITY         | 5          | 0          | 1          | 0          | 3           | 4          | 9           | 9          | 2          | 0         | 33                    |
| PRIVATE            | 9          | 15         | 6          | 2          | 8           | 6          | 17          | 7          | 6          | 1         | 77                    |
| NOT IDENTIFIED     | 28         | 0          | 0          | 0          | 0           | 0          | 0           | 0          | 0          | 0         | 28                    |
| <b>TOTAL</b>       | <b>284</b> | <b>305</b> | <b>722</b> | <b>307</b> | <b>1228</b> | <b>334</b> | <b>1209</b> | <b>839</b> | <b>439</b> | <b>58</b> | <b>5725</b>           |

Source: SISVEFLU

Abbreviations: SSA, Secretaría de Salubridad y Asistencia (the Federal Secretariat of Health), IMSS, Instituto Mexicano del Seguro Social (Mexican Social Security Institute); ISSSTE, Instituto de Seguridad y Servicios Sociales para los Trabajadores del Estado (Institute for Social Security and Services for State Workers); IMSS-OPORTUNIDADES, IMSS-Opportunities; PEMEX, Petroleos Mexicanos (Mexican Petroleum); SEDENA, Secretaría de Defensa Nacional (Secretariat of National Defense); DIF, Sistema Nacional para el Desarrollo Integral de la Familia (National System for Integral Family Development).

**Table S2.2.** Classification of cases in each scenario according to health outcome

| SISVEFLU Code                            | Description                                                                                                                                                                                            | Scenario |
|------------------------------------------|--------------------------------------------------------------------------------------------------------------------------------------------------------------------------------------------------------|----------|
| <b>Patients who seek ambulatory care</b> |                                                                                                                                                                                                        |          |
| DISCHARGE                                | Patient who sought ambulatory care and was discharged. It is not clear if the patient continues pharmacological treatment after discharge; nonetheless the costs of drug therapy are already executed. | 1        |
| UNDER TREATMENT                          | Patient who sought ambulatory care, was discharged, and continued treatment.                                                                                                                           | 1        |



| SISVEFLU Code                           | Description                                                                                                                                                                                                                                                                           | Scenario |
|-----------------------------------------|---------------------------------------------------------------------------------------------------------------------------------------------------------------------------------------------------------------------------------------------------------------------------------------|----------|
| HOUSEHOLD FOLLOW-UP                     | Patient who sought ambulatory care, was discharged, and continued treatment with household visits.                                                                                                                                                                                    | 1        |
| FINALISED TREATMENT                     | Patient who sought ambulatory care, was discharged, and finalized treatment.                                                                                                                                                                                                          | 1        |
| REFERRAL                                | Patient who sought ambulatory care and was referred to a hospital for follow-up                                                                                                                                                                                                       | 2        |
| DEATH                                   | Patient who sought ambulatory care and resulted in death.                                                                                                                                                                                                                             | 3        |
| NOT APPLICABLE                          | Patient who sought ambulatory care and whose health outcome is unknown. Given that health monitoring units follow a comprehensive protocol to register the final outcome of each case, it is inferred that these cases did not have any complications, and the outcome was discharge. | 1        |
| <b>Patients who seek inpatient care</b> |                                                                                                                                                                                                                                                                                       |          |
| UNDER TREATMENT                         | Patient who sought inpatient care, was discharged, and continued treatment in an ambulatory unit. In this case, we assume that patients only entered the emergency room and were not hospitalized during their stay.                                                                  | 1        |
| HOUSEHOLD FOLLOW-UP                     | Patient who sought inpatient care, was discharged, and was monitored through household visits from primary care or ambulatory units.                                                                                                                                                  | 1        |
| DISCHARGE CURATION                      |                                                                                                                                                                                                                                                                                       |          |
| DISCHARGE IMPROVEMENT                   | Patient who sought inpatient care, began treatment, and was discharged for monitoring through a primary care or ambulatory unit.                                                                                                                                                      | 4        |
| DISCHARGE TRANSFER                      |                                                                                                                                                                                                                                                                                       |          |
| VOLUNTARY DISCHARGE                     |                                                                                                                                                                                                                                                                                       |          |
| NON-SEVERE CASE                         | Patient who sought inpatient care, was hospitalized, began treatment, and was classified as a non-severe case. Outcome was complete recovery and discharge.                                                                                                                           | 5        |
| SEVERE CASE                             | Patient who sought inpatient care, was hospitalized, began treatment, and was classified as a severe case. Outcome was complete recovery and discharge.                                                                                                                               | 6        |
| REFERRAL                                | Patient who sought inpatient care, was hospitalized, began treatment, and due to the severity of the case, was referred to a tertiary hospital. Outcome was complete recovery and discharge.                                                                                          | 6        |
| DEATH                                   | Patient who sought inpatient care, was hospitalized, began treatment, and did not respond to it. Outcome was death.                                                                                                                                                                   | 7        |

Source: Author's elaboration using SISVEFLU codes

**Table S2.3.** Health outcomes and classification by scenario. Results from SISVEFLU

| Health outcome         | Number of cases | Total number of cases | Scenario |
|------------------------|-----------------|-----------------------|----------|
| <b>Ambulatory care</b> |                 |                       |          |
| UNDER TREATMENT        | 1546            | 2309                  | 1        |
| HOUSEHOLD FOLLOW-UP    | 33              |                       |          |
| FINALISED TREATMENT    | 121             |                       |          |
| NOT APPLICABLE         | 609             |                       |          |
| REFERRAL               | 5               | 5                     | 2        |

| Health outcome               | Number of cases | Total number of cases | Scenario |
|------------------------------|-----------------|-----------------------|----------|
| DEATH                        | 16              | 16                    | 3        |
| <b>Total ambulatory care</b> | <b>2330</b>     | <b>40.7%</b>          |          |
| <b>Inpatient care</b>        |                 |                       |          |
| DISCHARGE CURATION           | 31              |                       |          |
| DISCHARGE IMPROVEMENT        | 23              |                       |          |
| DISCHARGE TRANSFER           | 1414            | 1492                  | 4        |
| VOLUNTARY DISCHARGE          | 24              |                       |          |
| NON-SEVERE CASE              | 690             | 690                   | 5        |
| SEVERE CASE                  | 384             |                       |          |
| REFERRAL                     | 10              | 394                   | 6        |
| DEATH                        | 819             | 819                   | 7        |
| <b>Total inpatient care</b>  | <b>3395</b>     | <b>59.3%</b>          |          |
| <b>Total number of cases</b> |                 | <b>5725</b>           |          |

Source: Author's elaboration using SISVEFLU codes.

**Table S2.4.** Distribution of cases per season and scenario

| Scenario | 2009–2010 | 2010–2011 | 2011–2012 | 2012–2013 | 2013–2014 | 2014–2015 | 2015–2016 | 2016–2017 | 2017–2018 | 2018–2019 | TOTAL       |               |
|----------|-----------|-----------|-----------|-----------|-----------|-----------|-----------|-----------|-----------|-----------|-------------|---------------|
| 1        | 108       | 215       | 368       | 205       | 399       | 150       | 425       | 273       | 150       | 16        | <b>2309</b> | <b>40.3%</b>  |
| 2        | 0         | 1         | 3         | 0         | 1         | 0         | 0         | 0         | 0         | 0         | <b>5</b>    | <b>0.1%</b>   |
| 3        | 0         | 0         | 0         | 0         | 6         | 2         | 6         | 2         | 0         | 0         | <b>16</b>   | <b>0.3%</b>   |
| 4        | 52        | 28        | 116       | 51        | 292       | 64        | 409       | 321       | 147       | 12        | <b>1492</b> | <b>26.1%</b>  |
| 5        | 48        | 37        | 109       | 22        | 190       | 80        | 95        | 58        | 42        | 9         | <b>690</b>  | <b>12.1%</b>  |
| 6        | 41        | 17        | 50        | 18        | 78        | 16        | 67        | 51        | 42        | 14        | <b>394</b>  | <b>6.9%</b>   |
| 7        | 35        | 7         | 76        | 11        | 262       | 22        | 207       | 134       | 58        | 7         | <b>819</b>  | <b>14.3%</b>  |
| TOTAL    | 284       | 305       | 722       | 307       | 1228      | 334       | 1209      | 839       | 439       | 58        | 5725        | <b>100.0%</b> |

Source: Author's elaboration using SISVEFLU codes

### Supplement 3

**Table S3.1.** Prevalence of the population aged 50 to 59 years with risk factors for influenza complications

| Condition                     | Prevalence in the population aged 50–59 years | Reference |
|-------------------------------|-----------------------------------------------|-----------|
| <b>Respiratory conditions</b> |                                               |           |

|                                        |              |      |
|----------------------------------------|--------------|------|
| COPD <sup>1</sup>                      | 2.60         | [35] |
| Asthma                                 | 2.28         | [35] |
| <b>Cardiovascular conditions</b>       |              |      |
| Stroke <sup>2</sup>                    | 0.90         | [35] |
| Angina                                 | 2.00         | [35] |
| Myocardial infarction <sup>3</sup>     | 1.70         | [35] |
| Heart failure                          | 1.60         | [35] |
| <b>Metabolic conditions</b>            |              |      |
| Diabetes <sup>4</sup>                  | 10.55        | [35] |
| Morbid obesity                         | 6.68         | [35] |
| Uncontrolled hypertension              | 12.42        | [35] |
| <b>Immunity disorders &amp; cancer</b> |              |      |
| AIDS/HIV                               | 0.20         | [35] |
| Cancer                                 | 0.30         | [35] |
| Chronic Kidney Disease <sup>5</sup>    | 6.08         | [35] |
| Pregnancy                              | 0.00         | [35] |
| Asplenia                               | 0.01         | [35] |
| Sickle cell disease                    | 0.01         | [35] |
| <hr/>                                  |              |      |
|                                        | <b>47.33</b> |      |
| <hr/>                                  |              |      |

<sup>1</sup> Corrected for double counting patients with asthma, assuming 40% of COPD patients also have asthma based on van der Molen et al. [36].

<sup>2</sup> Corrected for double counting patients with heart failure, assuming 16.5% of stroke survivors also have heart failure based on Balzi et al. [37].

<sup>3</sup> Corrected for double counting patients with angina, heart failure and stroke; assuming 26% of myocardial infarction survivors also have angina [38], 6.5% also have heart failure [38], and 8% have a history of stroke [37].

<sup>4</sup> Corrected for double counting patients with obesity, assuming 41.9% of diabetes patients are also obese based on Nguyen et al. [39].

<sup>5</sup> Corrected for double counting patients with hypertension, assuming 40.92% of CKD patients have uncontrolled hypertension; corrected for double counting patients with diabetes, assuming 17% of CKD patients are also diabetic. Based on Fraser et al. [40].

Abbreviations: AIDS, acquired immune deficiency syndrome; CKD, chronic kidney disease; COPD, chronic obstructive pulmonary disease; HIV, human immunodeficiency virus.

**Table S3.2.** Cases, deaths and lethality in the population aged 50 to 59 years (2009–2018)

| <b>Risk factors<sup>1</sup></b> | <b>Cases</b> | <b>%</b>   | <b>Deaths</b> | <b>%</b>   | <b>Lethality %</b> |
|---------------------------------|--------------|------------|---------------|------------|--------------------|
| <b>Not known or absent</b>      | 2935         | 51.27      | 260           | 31.21      | 8.86               |
| <b>Previously known</b>         | 2790         | 48.73      | 573           | 68.79      | 20.54              |
| <b>Total</b>                    | <b>5725</b>  | <b>100</b> | <b>833</b>    | <b>100</b> | <b>14.55</b>       |

Source: SISVEFLU

<sup>1</sup> Diabetes, COPD, asthma, immunosuppression, HIV infection /AIDS, cardiac disease, obesity, chronic kidney disease, and pregnancy.

Abbreviations: AIDS, acquired immunodeficiency syndrome; COPD, chronic obstructive pulmonary disease; HIV, human immunodeficiency virus; SISVEFLU, Mexico's Influenza Surveillance System

## Supplement 4

**Table S4.1.** Unit costs (Mexican pesos) using 2018 prices from the three largest public health care providers in Mexico

| Item                    | Cost<br>ISSSTE | Cost<br>IMSS | Cost<br>SSA |
|-------------------------|----------------|--------------|-------------|
| Outpatient consultation | 370.48         | 733.00       | 98.80       |
| Specialist consultation | 811.53         | 1160.00      | 98.80       |
| Emergency room care     | 811.53         | 562.00       | 305.21      |
| PCR                     | 2380.47        | 1932.43      | 2380.47     |
| Bacteriologic culture   | 201.34         | 201.34       | 201.34      |
| Amantadine              | 45.00          | 45.00        | 45.00       |
| Oseltamivir             | 110.87         | 110.87       | 110.87      |
| Paracetamol             | 9.30           | 3.12         | 3.12        |
| Ceftriaxone             | 11.87          | 11.89        | 10.67       |
| Hospitalization bed-day | 2064.12        | 7757.00      | 305.21      |

Abbreviations: IMSS, Instituto Mexicano del Seguro Social (Mexican Social Security Institute); ISSSTE, Instituto de Seguridad y Servicios Sociales para los Trabajadores del Estado (Institute for Social Security and Services for State Workers); SSA, Secretaría de Salubridad y Asistencia (the Federal Secretariat of Health); PCR, polymerase chain reaction.

Data sources for each unit cost are the following:

### ISSSTE

- Outpatient consultation, specialist consultation, emergency room (ER) care, and hospitalization bed-day: publicly available data from Mexico's Ministry of Health (Secretaría de Salud, <http://www.salud.gob.mx/unidades/cdi/documentos/DOCSAL7417.pdf>), assessed 2 January 2020)
- Amantadine: 2018 drugstore price, sold as an over-the-counter drug; it does not require a prescription and therefore can be purchased directly by the patient (San Pablo Farmacia, <https://www.farmaciasanpablo.com.mx/medicamentos/genericos/a---b---c---d/clorhidrato-de-amantadina-50-mg-clorfenamina-3-mg-paracetamol-300-mg/p/000000000060160010>), accessed on 5 January 2020).
- Oseltamivir: 2018 price through consolidated government purchase.
- Paracetamol and Ceftriaxone: ISSSTE's 2019 Annual Acquisitions Program (ISSSTE, [http://www.issste.gob.mx/images/downloads/instituto/administracion/paaas\\_2019.pdf](http://www.issste.gob.mx/images/downloads/instituto/administracion/paaas_2019.pdf)), accessed on 5 January 2020). For paracetamol, the code is 25301688; for ceftriaxone, the code is 25300461.
- PCR and throat swab: 2018 price list InDRE.

## IMSS

- Outpatient consultation, specialist consultation, ER care, and hospitalization bed-day: Mexico's Official Federal Gazette (SEGOB, [http://www.issste.gob.mx/images/downloads/instituto/administracion/paaas\\_2019.pdf](http://www.issste.gob.mx/images/downloads/instituto/administracion/paaas_2019.pdf)), accessed on 5 January 2020).
- Amantadine: 2018 drugstore public price (ISSSTE, [http://www.issste.gob.mx/images/downloads/instituto/administracion/paaas\\_2019.pdf](http://www.issste.gob.mx/images/downloads/instituto/administracion/paaas_2019.pdf)), accessed on 5 January 2020).
- Oseltamivir: 2018 price through consolidated government purchase.
- Paracetamol: IMSS Acquisitions Portal (Instituto Mexicano del Seguro Social, <http://compras.imss.gob.mx/?P=imsscomprofich&f=22409921&pr=>), accessed on 5 January 2020).
- Ceftriaxone: IMSS Acquisitions Portal (Instituto Mexicano del Seguro Social, <http://compras.imss.gob.mx/?P=imsscomprofich&f=22409744&pr=>), accessed on 5 January 2020).
- PCR and throat swab: 2018 price list InDRE.

## SSA

- Outpatient consultation, specialist consultation, ER care, and hospitalization bed-day: publicly available data from Mexico's Ministry of Health (Secretaría de Salud, <http://www.salud.gob.mx/unidades/cdi/documentos/DOCSAL7417.pdf>), assessed 2 January 2020; and SEGOB, [http://www.issste.gob.mx/images/downloads/instituto/administracion/paaas\\_2019.pdf](http://www.issste.gob.mx/images/downloads/instituto/administracion/paaas_2019.pdf)), accessed on 5 January 2020).
- Amantadine: 2018 drugstore public price (ISSSTE, [http://www.issste.gob.mx/images/downloads/instituto/administracion/paaas\\_2019.pdf](http://www.issste.gob.mx/images/downloads/instituto/administracion/paaas_2019.pdf)), accessed on 5 January 2020).
- Oseltamivir: 2018 price through consolidated government purchase.
- Paracetamol: IMSS Acquisitions Portal (Instituto Mexicano del Seguro Social, <http://compras.imss.gob.mx/?P=imsscomprofich&f=22409921&pr=>), accessed on 5 January 2020).
- Ceftriaxone: IMSS Acquisitions Portal (Instituto Mexicano del Seguro Social, <http://compras.imss.gob.mx/?P=imsscomprofich&f=22409744&pr=>), accessed on 5 January 2020).
- PCR and throat swab: 2018 price list InDRE.

**Table S4.2.** Unit cost (Mexican pesos) by public health provider and season

| Unit cost               | Season    |           |           |           |           |           |           |           |           |
|-------------------------|-----------|-----------|-----------|-----------|-----------|-----------|-----------|-----------|-----------|
|                         | 2009–2010 | 2010–2011 | 2011–2012 | 2012–2013 | 2013–2014 | 2014–2015 | 2015–2016 | 2016–2017 | 2017–2018 |
| <b>IMSS</b>             |           |           |           |           |           |           |           |           |           |
| Outpatient consultation | 536.69    | 554.98    | 577.80    | 599.79    | 623.90    | 640.87    | 658.95    | 698.77    | 733.00    |
| Specialist consultation | 849.34    | 878.28    | 914.39    | 949.20    | 987.34    | 1014.20   | 1042.82   | 1105.82   | 1160.00   |
| ER care                 | 411.49    | 425.51    | 443.01    | 459.87    | 478.35    | 491.36    | 505.23    | 535.75    | 562.00    |
| Hospitalization bed-day | 5679.59   | 5873.12   | 6114.59   | 6347.34   | 6602.41   | 6782.04   | 6973.41   | 7394.71   | 7757.00   |
| Amantadine              | 32.95     | 34.07     | 35.47     | 36.82     | 38.30     | 39.34     | 40.45     | 42.90     | 45.00     |
| Oseltamivir             | 81.18     | 83.94     | 87.40     | 90.72     | 94.37     | 96.94     | 99.67     | 105.69    | 110.87    |
| Paracetamol             | 2.28      | 2.36      | 2.46      | 2.55      | 2.66      | 2.73      | 2.80      | 2.97      | 3.12      |
| Ceftriaxone             | 8.71      | 9.00      | 9.37      | 9.73      | 10.12     | 10.40     | 10.69     | 11.33     | 11.89     |
| PCR                     | 1414.90   | 1463.12   | 1523.27   | 1581.25   | 1644.80   | 1689.55   | 1737.22   | 1842.17   | 1932.43   |
| Bacteriologic culture   | 147.42    | 152.44    | 158.71    | 164.75    | 171.37    | 176.03    | 181.00    | 191.94    | 201.34    |
| <b>ISSSTE</b>           |           |           |           |           |           |           |           |           |           |
| Outpatient consultation | 271.26    | 280.51    | 292.04    | 303.16    | 315.34    | 323.92    | 333.06    | 353.18    | 370.48    |
| Specialist consultation | 594.20    | 614.44    | 639.71    | 664.06    | 690.74    | 709.53    | 729.56    | 773.63    | 811.53    |
| ER care                 | 594.20    | 614.44    | 639.71    | 664.06    | 690.74    | 709.53    | 729.56    | 773.63    | 811.53    |
| Hospitalization bed-day | 1511.33   | 1562.82   | 1627.08   | 1689.01   | 1756.89   | 1804.68   | 1855.61   | 1967.71   | 2064.12   |
| Amantadine              | 32.95     | 34.07     | 35.47     | 36.82     | 38.30     | 39.34     | 40.45     | 42.90     | 45.00     |
| Oseltamivir             | 81.18     | 83.94     | 87.40     | 90.72     | 94.37     | 96.94     | 99.67     | 105.69    | 110.87    |
| Paracetamol             | 6.81      | 7.04      | 7.33      | 7.61      | 7.92      | 8.13      | 8.36      | 8.87      | 9.30      |
| Ceftriaxone             | 8.69      | 8.99      | 9.36      | 9.71      | 10.10     | 10.38     | 10.67     | 11.32     | 11.87     |
| PCR                     | 1742.95   | 1802.34   | 1876.45   | 1947.87   | 2026.15   | 2081.27   | 2140.00   | 2269.29   | 2380.47   |
| Bacteriologic culture   | 147.42    | 152.44    | 158.71    | 164.75    | 171.37    | 176.03    | 181.00    | 191.94    | 201.34    |
| <b>SSA</b>              |           |           |           |           |           |           |           |           |           |
| Outpatient consultation | 72.34     | 74.80     | 77.88     | 80.84     | 84.09     | 86.38     | 88.82     | 94.18     | 98.80     |
| Specialist consultation | 72.34     | 74.80     | 77.88     | 80.84     | 84.09     | 86.38     | 88.82     | 94.18     | 98.80     |
| ER care                 | 223.47    | 231.08    | 240.59    | 249.74    | 259.78    | 266.85    | 274.38    | 290.95    | 305.21    |
| Hospitalization bed-day | 223.47    | 231.08    | 240.59    | 249.74    | 259.78    | 266.85    | 274.38    | 290.95    | 305.21    |
| Amantadine              | 32.95     | 34.07     | 35.47     | 36.82     | 38.30     | 39.34     | 40.45     | 42.90     | 45.00     |
| Oseltamivir             | 81.18     | 83.94     | 87.40     | 90.72     | 94.37     | 96.94     | 99.67     | 105.69    | 110.87    |
| Paracetamol             | 2.28      | 2.36      | 2.46      | 2.55      | 2.66      | 2.73      | 2.80      | 2.97      | 3.12      |
| Ceftriaxone             | 7.81      | 8.08      | 8.41      | 8.73      | 9.08      | 9.33      | 9.59      | 10.17     | 10.67     |
| PCR                     | 1742.95   | 1802.34   | 1876.45   | 1947.87   | 2026.15   | 2081.27   | 2140.00   | 2269.29   | 2380.47   |
| Bacteriologic culture   | 147.42    | 152.44    | 158.71    | 164.75    | 171.37    | 176.03    | 181.00    | 191.94    | 201.34    |

Data adjusted using Mexico's National Consumer Price Index (INPC).

Abbreviations: IMSS, Instituto Mexicano del Seguro Social (Mexican Social Security Institute); ISSSTE, Instituto de Seguridad y Servicios Sociales para los Trabajadores del Estado (Institute for Social Security and Services for State Workers); ER, emergency room; PCR, polymerase chain reaction.

**Table S4.3.** Affiliated population by public health provider and season

| Season | IMSS <sup>1</sup> | ISSSTE <sup>2</sup> | SSA <sup>3</sup> |
|--------|-------------------|---------------------|------------------|
|--------|-------------------|---------------------|------------------|

---

|           |            |            |            |
|-----------|------------|------------|------------|
| 2009–2010 | 50,722,198 | 11,791,419 | 37,325,834 |
| 2010–2011 | 53,608,241 | 12,100,042 | 47,671,017 |
| 2011–2012 | 56,191,147 | 12,328,170 | 52,365,663 |
| 2012–2013 | 58,493,930 | 12,540,089 | 54,273,005 |
| 2013–2014 | 59,499,554 | 12,717,193 | 56,469,000 |
| 2014–2015 | 60,676,058 | 12,888,774 | 57,202,811 |
| 2015–2016 | 62,672,649 | 13,043,445 | 56,014,787 |
| 2016–2017 | 64,783,558 | 13,184,870 | 54,214,570 |
| 2017–2018 | 67,122,622 | 13,301,986 | 53,502,114 |

---

<sup>1</sup>IMSS: IMSS. Memoria Estadística 2018. [2018 Statistical Report] Available online: <http://www.imss.gob.mx/conoce-al-imss/memoria-estadistica-2018>

<sup>2</sup>ISSSTE: ISSSTE. Anuario Estadística 2018 [2018 Annual Statistical Report]. Available online: <http://www.issste.gob.mx/datosabiertos/anuarios/anuarios2018.html#cap1>

<sup>3</sup>Seguro Popular. Seguro Popular. Beneficiarios de Protección Social en Salud de Seguro Popular. [Popular insurance. Beneficiaries of Social Protection in Popular Health Insurance.] Available online: <https://datos.gob.mx/busca/dataset/beneficiarios-de-proteccion-social-en-salud-de-seguro-popular>

Abbreviations: IMSS, Instituto Mexicano del Seguro Social (Mexican Social Security Institute); ISSSTE, Instituto de Seguridad y Servicios Sociales para los Trabajadores del Estado (Institute for Social Security and Services for State Workers); SSA, Secretaría de Salubridad y Asistencia (the Federal Secretariat of Health).



**Table S4.4.** Average weighted cost (Mexican pesos) by season

| Unit cost               | Season    |           |           |           |           |           |           |           |           |
|-------------------------|-----------|-----------|-----------|-----------|-----------|-----------|-----------|-----------|-----------|
|                         | 2009-2010 | 2010-2011 | 2011-2012 | 2012-2013 | 2013-2014 | 2014-2015 | 2015-2016 | 2016-2017 | 2017-2018 |
| Outpatient consultation | 331.74    | 323.79    | 332.10    | 345.34    | 356.53    | 367.07    | 384.25    | 416.33    | 443.64    |
| Specialist consultation | 528.72    | 512.30    | 524.01    | 544.56    | 561.67    | 578.31    | 606.14    | 657.76    | 701.45    |
| ER care                 | 362.78    | 363.93    | 375.38    | 389.29    | 403.43    | 414.65    | 429.28    | 459.08    | 484.20    |
| Hospitalization bed-day | 3147.49   | 3040.89   | 3112.41   | 3240.17   | 3340.33   | 3441.46   | 3618.09   | 3939.79   | 4214.67   |
| Amantadine              | 32.95     | 34.07     | 35.47     | 36.82     | 38.30     | 39.34     | 40.45     | 42.90     | 45.00     |
| Oseltamivir             | 81.18     | 83.94     | 87.40     | 90.72     | 94.37     | 96.94     | 99.67     | 105.69    | 110.87    |
| Paracetamol             | 2.82      | 2.86      | 2.96      | 3.06      | 3.18      | 3.26      | 3.35      | 3.56      | 3.73      |
| Ceftriaxone             | 8.37      | 8.61      | 8.95      | 9.30      | 9.66      | 9.93      | 10.22     | 10.86     | 11.40     |
| PCR                     | 1576.29   | 1641.95   | 1712.28   | 1776.73   | 1849.83   | 1899.51   | 1948.37   | 2059.96   | 2155.92   |
| Bacteriologic culture   | 147.42    | 152.44    | 158.71    | 164.75    | 171.37    | 176.03    | 181.00    | 191.94    | 201.34    |

Abbreviations: ER, emergency room; PCR, polymerase chain reaction

## Supplement 5

**Table S5.** Effectiveness of influenza vaccination in the Northern Hemisphere

| Effectiveness                                     | 95% CI                                    | Source                                                                                                                                                                                                                                                                                                                                                                                               |
|---------------------------------------------------|-------------------------------------------|------------------------------------------------------------------------------------------------------------------------------------------------------------------------------------------------------------------------------------------------------------------------------------------------------------------------------------------------------------------------------------------------------|
| <b>2009–2010</b>                                  |                                           |                                                                                                                                                                                                                                                                                                                                                                                                      |
| 56%                                               | 23%–75%                                   | Griffin, M.R.; Monto, A.S.; Belongia, E.A.; Treanor, J.J.; Chen, Q.; Chen, J.; Talbot, H.K.; Ohmit, S.E.; Coleman, L.A.; Lofthus, G.; et al. Effectiveness of non-adjuvanted pandemic influenza a vaccines for preventing pandemic influenza acute respiratory illness visits in 4 U. S. Communities. <i>PLoS One</i> . <b>2011</b> , 6, e23085.                                                     |
| <b>2010–2011</b>                                  |                                           |                                                                                                                                                                                                                                                                                                                                                                                                      |
| 60%                                               | 53%–66%                                   | Treanor, J.J.; Talbot, H.K.; Ohmit, S.E.; Coleman, L.A.; Thompson, M.G.; Cheng, P.Y.; Petrie, J.G.; Lofthus, G.; Meece, J.K.; Williams, J.V.; et al. Effectiveness of seasonal influenza vaccines in the United States during a season with circulation of all three vaccine strains. <i>Clin. Infect. Dis.</i> <b>2012</b> , 55, 951–959.                                                           |
| <b>2011–2012</b>                                  |                                           |                                                                                                                                                                                                                                                                                                                                                                                                      |
| 47%                                               | 36%–56%                                   | Ohmit, S.E.; Thompson, M.G.; Petrie, J.G.; Thaker, S.N.; Jackson, M.L.; Belongia, E.A.; Zimmerman, R.K.; Gaglani, M.; Lamerato, L.; Spencer, S.M.; et al. Influenza vaccine effectiveness in the 2011–2012 season: Protection against each circulating virus and the effect of prior vaccination on estimates. <i>Clin. Infect. Dis.</i> <b>2015</b> , 58, 319–327.                                  |
| 59%                                               | 43%–70%                                   | Skowronski, D.M.; Janjua, N.Z.; Sabaiduc, S.; De Serres, G.; Winter, A.L.; Gubbay, J.B.; Dickinson, J.A.; Fonseca, K.; Charest, H.; Bastien, N.; et al. Influenza A/subtype and B/lineage effectiveness estimates for the 2011–2012 trivalent vaccine: Cross-season and cross-lineage protection with unchanged vaccine. <i>J. Infect. Dis.</i> <b>2014</b> , 210, 126–137.                          |
| A(H1N1)pdm09: 42.80%<br>A(H3N2): 38.1%            | 6.3%–65.0%                                | Rondy, M.; Castilla, J.; Launay, O.; Costanzo, S.; Ezpeleta, C.; Galtier, F.; de Gaetano Donati, K.; Moren, A. Moderate influenza vaccine effectiveness against hospitalisation with A(H3N2) and A(H1N1) influenza in 2013–14: Results from the InNHOVE network. <i>Hum. Vaccin. Immunother.</i> <b>2016</b> , 12, 1217–1224.                                                                        |
| <b>2012–2013</b>                                  |                                           |                                                                                                                                                                                                                                                                                                                                                                                                      |
| 49%                                               | 43%–55%                                   | McLean, H.Q.; Thompson, M.G.; Sundaram, M.E.; Kieke, B.A.; Gaglani, M.; Murthy, K.; Piedra, P.A.; Zimmerman, R.K.; Nowalk, M.P.; Raviotta, J.M.; et al. Influenza vaccine effectiveness in the United States during 2012–2013: Variable protection by age and virus type. <i>J. Infect. Dis.</i> <b>2015</b> , 211, 1529–1540.                                                                       |
| A(H3N2): 42.2%<br>A(H1N1)pdm09: 50.4%<br>B: 49.3% | 14.9%–60.7%<br>28.4%–65.6%<br>28.4%–65.6% | Kissling, E.; Valenciano, M.; Buchholz, U.; Larrauri, A.; Cohen, J.M.; Nunes, B.; Rogalska, J.; Pitigoi, D.; Paradowska-Stankiewicz, I.; Reuss, A.; et al. Influenza vaccine effectiveness estimates in Europe in a season with three influenza type/subtypes circulating: the I-MOVE multi-centre case-control study, influenza season 2012/13. <i>Euro. Surveill.</i> <b>2014</b> , 19, pii=20701. |

|                                                   |                                        |                                                                                                                                                                                                                                                                                                                                                                                                                                                             |
|---------------------------------------------------|----------------------------------------|-------------------------------------------------------------------------------------------------------------------------------------------------------------------------------------------------------------------------------------------------------------------------------------------------------------------------------------------------------------------------------------------------------------------------------------------------------------|
| <b>2013–2014</b>                                  |                                        |                                                                                                                                                                                                                                                                                                                                                                                                                                                             |
| 68%                                               | 58%–76%                                | Skowronski, D.M.; Chambers, C.; Sabaiduc, S.; De Serres, G.; Winter, A.L.; Dickinson, J.A.; Gubbay, J.; Fonseca, K.; Charest, H.; Krajden, M.; et al. Integrated sentinel surveillance linking genetic, antigenic, and epidemiologic monitoring of influenza vaccine-virus relatedness and effectiveness during the 2013-2014 influenza season. <i>J. Infect. Dis.</i> <b>2015</b> , <i>212</i> , 726–739.                                                  |
| 54%                                               | 46%–61%                                | Gaglani, M.; Pruszyński, J.; Murthy, K.; Clipper, L.; Robertson, A.; Reis, M.; Chung, J.R.; Piedra, P.A.; Avadhanula, V.; Nowalk, M.P.; et al. Influenza vaccine effectiveness against 2009 pandemic influenza A(H1N1) virus differed by vaccine type during 2013-2014 in the United States.                                                                                                                                                                |
| <b>2014–2015</b>                                  |                                        |                                                                                                                                                                                                                                                                                                                                                                                                                                                             |
| 19%                                               | 10%–27%                                | Zimmerman, R.K.; Nowalk, M.P.; Chung, J.; Jackson, M.L.; Jackson, L.A.; Pietre, J.G.; Monto, A.S.; McLean, H.Q.; Belongia, E.A.; Gaglani, M.; et al. 2014-2015 influenza vaccine effectiveness in the United States by vaccine type. <i>Clin. Infect. Dis.</i> <b>2016</b> , <i>63</i> , 1564–1573.                                                                                                                                                         |
| A(H3N2): 14.4%<br>A(H1N1)pdm09: 54.2%<br>B: 48.0% | 6.3%–31%<br>31.2%–69.6%<br>28.9%–61.9% | Valenciano, M.; Kissling, E.; Reuss, A.; Rizzo, C.; Gherasim, A.; Horvath, J.K.; Domegan, L.; Pitigoi, D.; Machado, A.; Paradowska-Stankiewicz, I.A.; et al. Vaccine effectiveness in preventing laboratory-confirmed influenza in primary care patients in a season of co-circulation of influenza A(H1N1)pdm09, B and drifted A(H3N2), I-MOVE multicentre case-control study, Europe 2014/15. <i>Euro. Surveill.</i> <b>2016</b> , <i>21</i> , pii=30139. |
| 22%                                               | 8%–33%                                 | Puig-Barberà, J.; Burtseva, E.; Yu, H.; Cowling, B.J.; Badur, S.; Kyncl, J.; Sominina, A.; GIHSN. Influenza epidemiology and influenza vaccine effectiveness during the 2014-2015 season: annual report from the Global Influenza Hospital Surveillance Network. <i>BMC Public Health</i> . <b>2016</b> , <i>16</i> (Suppl 1), 757.                                                                                                                         |
| <b>2015–2016</b>                                  |                                        |                                                                                                                                                                                                                                                                                                                                                                                                                                                             |
| 48%                                               | 41%–55%                                | Jackson, M.L.; Chung, J.R.; Jackson, L.A.; Phillips, C.H.; Benoit, J.; Monto, A.S.; Martin, E.T.; Belongia, E.A.; McLean, H.Q.; Gaglani, M.; et al. Influenza vaccine effectiveness in the United States during the 2015-2016 season. <i>N. Engl. J. Med.</i> <b>2017</b> , <i>377</i> , 534–543.                                                                                                                                                           |
| 64%                                               | 44%–77%                                | Chambers, C.; Skowronski, D.M.; Sabaiduc, S.; Winter, A.L.; Dickinson, J.A.; De Serres, G.; Gubbay, J.B.; Drews, S.J.; Martineau, C.; Eshaghi, A.; et al. Interim estimates of 2015/16 vaccine effectiveness against influenza A(H1N1)pdm09, Canada, February 2016. <i>Euro. Surveill.</i> <b>2016</b> , <i>21</i> , 30168.                                                                                                                                 |
| 32.9%                                             | 15.5%–46.7%                            | Kissling, E.; Valenciano, M.; Pozo, F.; Vilcu, A.M.; Reuss, A.; Rizzo, C.; Larrauri, A.; Horvath, J.K.; Brytting, M.; Domegan, L.; et al. 2015/16 I-MOVE/I-MOVE+ multicentre case-control study in Europe: Moderate vaccine effectiveness estimates against influenza A(H1N1)pdm09 and low estimates against lineage-mismatched influenza B among children. <i>Influenza Other Respir. Viruses</i> . <b>2018</b> , <i>12</i> , 423–437.                     |
| <b>2016–2017</b>                                  |                                        |                                                                                                                                                                                                                                                                                                                                                                                                                                                             |

|                  |         |                                                                                                                                                                                                                                                                                                                                               |
|------------------|---------|-----------------------------------------------------------------------------------------------------------------------------------------------------------------------------------------------------------------------------------------------------------------------------------------------------------------------------------------------|
| 48%              | 37%–57% | Flannery, B.; Chung, J.R.; Thaker, S.N.; Monto, A.S.; Martin, E.T.; Belongia, E.A.; McLean, H.Q.; Gaglani, M.; Murthy, K.; Zimmerman, R.K.; et al. Interim estimates of 2016–17 seasonal influenza vaccine effectiveness — United States, February 2017. <i>MMWR Morb. Mortal. Wkly. Rep.</i> <b>2017</b> , 66, 167–171.                      |
| <b>2017–2018</b> |         |                                                                                                                                                                                                                                                                                                                                               |
| 36%              | 27%–44% | Flannery, B.; Chung, J.R.; Thaker, S.N.; Monto, A.S.; Martin, E.T.; Belongia, E.A.; McLean, H.Q.; Gaglani, M.; Murthy, K.; Zimmerman, R.K.; et al. Interim estimates of 2016–17 seasonal influenza vaccine effectiveness — United States, February 2017. <i>MMWR Morb. Mortal. Wkly. Rep.</i> <b>2017</b> , 66, 167–171.                      |
| 42%              | 25%–55% | Skowronski, D.M.; Chambers, C.; De Serres, G.; Dickinson, J.A.; Winter, A.L.; Hickman, R.; Chan, T.; Jassem, A.N.; Drews, S.J.; Charest, H.; et al. Early season co-circulation of influenza A(H3N2) and B(Yamagata): interim estimates of 2017/18 vaccine effectiveness, Canada, January 2018. <i>Euro. Surveill.</i> <b>2018</b> , 23, 1–7. |
| <b>2018–2019</b> |         |                                                                                                                                                                                                                                                                                                                                               |
| 47%              | 34%–57% | Doyle, J.D.; Chung, J.R.; Kim, S.S.; Gaglani, M.; Raiyani, C.; Zimmerman, R.K.; Nowalk, M.P.; Jackson, M.L.; Jackson, L.A.; Monto, A.S.; et al. Interim estimates of 2018–19 seasonal influenza vaccine effectiveness — United States, February 2019. <i>MMWR Morb. Mortal. Wkly. Rep.</i> <b>2019</b> , 68, 135–139.                         |

Abbreviation: CI, confidence interval.

## Supplement 6

**Table S6.1.** Estimated influenza cases averted by immunizing the target population<sup>1</sup>

| Scenario | Cases With No Influenza Immunization | Cases With Influenza Immunization<br>50% Coverage<br>50% Effectiveness | Cases Averted |
|----------|--------------------------------------|------------------------------------------------------------------------|---------------|
| 0        | 531,700                              | 398,762                                                                | 132,939       |
| 1        | 133,868                              | 100,398                                                                | 33,471        |
| 2        | 267                                  | 201                                                                    | 67            |
| 4        | 71,534                               | 53,649                                                                 | 17,885        |
| 5        | 38,575                               | 28,930                                                                 | 9645          |
| 6        | 21,973                               | 16,479                                                                 | 5494          |
| Total    | 797,918                              | 598,418                                                                | 199,500       |

<sup>1</sup> Population aged 50 to 59 years without risk factors for influenza complications.

**Table S6.2.** Deaths averted by immunizing the target population<sup>1</sup>

| Scenario | No Influenza | Influenza Im- | Deaths Averted |
|----------|--------------|---------------|----------------|
|----------|--------------|---------------|----------------|

|       | Immunization | munization |      |
|-------|--------------|------------|------|
| 3     | 0.9          | 0.7        | 0.2  |
| 7     | 47.5         | 35.6       | 11.9 |
| TOTAL | 48.4         | 36.3       | 12.1 |

<sup>1</sup> Population aged 50 to 59 years without risk factors for influenza complications.

**Table S6.3.** Total economic costs of influenza treatment if the target population<sup>1</sup> is immunized

| Scenario                 | 0    | 1     | 2    | 3      | 4     | 5     | 6     | 7    | Cost   |
|--------------------------|------|-------|------|--------|-------|-------|-------|------|--------|
| Direct costs             |      |       |      |        |       |       |       |      |        |
| Laboratory diagnosis     | .    | 1.16  | 0.00 | 0.0000 | 6.20  | 3.66  | 2.08  | 0.00 | 13.11  |
| Medical consultations    | .    | 4.77  | 0.02 | 0.0001 | 3.41  | 2.93  | 2.29  | 0.01 | 13.42  |
| Drugs                    | 1.04 | 0.62  | 0.00 | 0.0000 | 0.33  | 0.20  | 0.11  | 0.00 | 2.30   |
| Hospitalizations         | .    | .     | 0.05 | 0.0013 | 24.24 | 54.25 | 46.35 | 0.07 | 124.95 |
| Total direct costs       | 1.04 | 6.55  | 0.07 | 0.00   | 34.18 | 61.02 | 50.83 | 0.08 | 153.78 |
| Indirect costs           |      |       |      |        |       |       |       |      |        |
| Productivity loss        | 0.00 | 5.09  | 0.03 | .      | 4.53  | 7.33  | 7.23  | .    | 24.20  |
| Premature death          | .    | .     | .    | 0.06   | .     | .     | .     | 2.91 | 2.97   |
| Total indirect costs     | 0.00 | 5.09  | 0.03 | 0.06   | 4.53  | 7.33  | 7.23  | 2.91 | 27.17  |
| Total costs of influenza | 1.04 | 11.64 | 0.10 | 0.06   | 38.71 | 68.35 | 58.06 | 2.99 | 180.95 |

Assumes 50% coverage and 50% effectiveness.

Amounts are in million US dollars.

<sup>1</sup> Population aged 50 to 59 years without risk factors for influenza complications.

## Supplement 7

**Figure S1.** Projection of population aged 50–59 years and total population in Mexico (2010–2030)

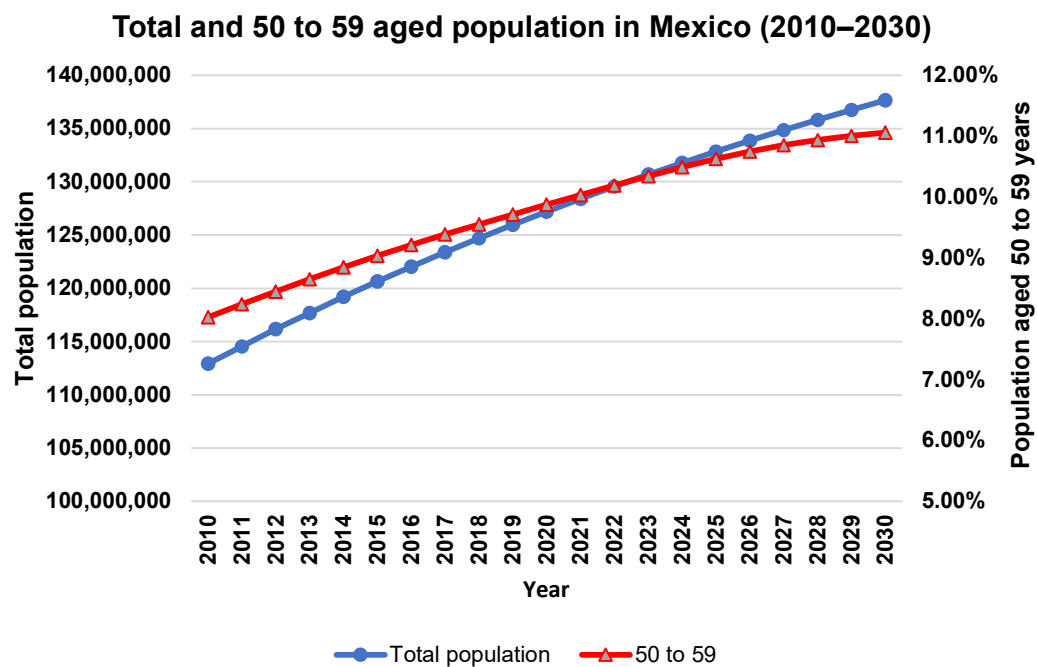

Source: Population projections from Consejo Nacional de Población [National Population Council]

## Supplement 8

### Text S3. Cases, deaths, and lethality by viral type (2009–2018)

The number of cases, deaths, and lethality of influenza by virus type and age group are shown in **Table S7.2**. For influenza A H1N1, the population group aged 50 to 59 years registered 23% more cases (3277), slightly more deaths (700), and a high lethality rate (21.36%) compared with the  $\geq 60$  years age group which registered 2659 cases and 676 deaths (lethality, 25.42%). It is important to note that the population aged  $\geq 60$  years is already a target group in the current vaccination schedule, whereas the 50 to 59 age group is not.

**Table S7.1.** Confirmed influenza cases by age group and season

| Age Group, Years              | 2009–2010 | 2010–2011 | 2011–2012 | 2012–2013 | 2013–2014 | 2014–2015 | 2015–2016 | 2016–2017 | 2017–2018 | 2018–2019 | TOTAL  | %      |
|-------------------------------|-----------|-----------|-----------|-----------|-----------|-----------|-----------|-----------|-----------|-----------|--------|--------|
| 0–4                           | 382       | 663       | 758       | 543       | 949       | 441       | 1150      | 899       | 695       | 37        | 6517   | 12.80  |
| 5–11                          | 259       | 589       | 756       | 454       | 655       | 309       | 931       | 660       | 466       | 42        | 5121   | 10.06  |
| 12–17                         | 205       | 317       | 562       | 279       | 461       | 223       | 507       | 315       | 221       | 9         | 3099   | 6.09   |
| 18–49                         | 1562      | 2057      | 3733      | 1558      | 4605      | 1360      | 4468      | 2621      | 1823      | 89        | 23,876 | 46.91  |
| 50–59<br>without risk factors | 155       | 200       | 412       | 177       | 623       | 170       | 582       | 384       | 216       | 16        | 2935   | 5.76   |
| 50–59<br>with risk factors    | 129       | 105       | 310       | 130       | 605       | 164       | 627       | 455       | 247       | 18        | 2790   | 5.48   |
| $\geq 60$                     | 201       | 398       | 513       | 378       | 1096      | 575       | 1370      | 1135      | 857       | 39        | 6562   | 12.89  |
| TOTAL                         | 2893      | 4329      | 7044      | 3519      | 8994      | 3242      | 9635      | 6469      | 4525      | 250       | 50,900 | 100.00 |

Source: SISVEFLU

**Table S7.2.** Cases, deaths, and lethality by viral type (2009–2018)

| Age Group,<br>Years                | A H1N1        |             |               | A H3N2        |            |              | A Undetermined |            |              | B Yamagata  |           |              | B Victoria  |           |              | B Undetermined |            |              |
|------------------------------------|---------------|-------------|---------------|---------------|------------|--------------|----------------|------------|--------------|-------------|-----------|--------------|-------------|-----------|--------------|----------------|------------|--------------|
|                                    | Cases         | Deaths      | Lethality     | Cases         | Deaths     | Lethality    | Cases          | Deaths     | Lethality    | Cases       | Deaths    | Lethality    | Cases       | Deaths    | Lethality    | Cases          | Deaths     | Lethality    |
| <1 <sup>1</sup>                    | 848           | 65          | 7.67%         | 502           | 10         | 1.99%        | 246            | 10         | 4.07%        | 72          | 1         | 1.39%        | 51          | 3         | 5.88%        | 257            | 14         | 5.45%        |
| 1–4 <sup>1</sup>                   | 2006          | 76          | 3.79%         | 1323          | 11         | 0.83%        | 465            | 5          | 1.08%        | 158         | 4         | 2.53%        | 144         | 1         | 0.69%        | 445            | 4          | 0.90%        |
| 5–11                               | 2057          | 58          | 2.82%         | 1327          | 9          | 0.68%        | 373            | 0          | 0%           | 280         | 2         | 0.71%        | 241         | 0         | 0%           | 843            | 6          | 0.71%        |
| 12–19                              | 1666          | 44          | 2.64%         | 1146          | 5          | 0.44%        | 287            | 2          | 0.70%        | 230         | 0         | 0%           | 185         | 2         | 1.08%        | 544            | 11         | 2.02%        |
| 20–24                              | 1731          | 54          | 3.12%         | 993           | 8          | 0.81%        | 288            | 3          | 1.04%        | 71          | 3         | 4.23%        | 119         | 1         | 0.84%        | 280            | 3          | 1.07%        |
| 25–29                              | 2180          | 113         | 5.18%         | 1101          | 13         | 1.18%        | 343            | 10         | 2.92%        | 76          | 1         | 1.32%        | 119         | 0         | 0.00%        | 345            | 5          | 1.45%        |
| 30–34                              | 2074          | 150         | 7.23%         | 1181          | 5          | 0.42%        | 383            | 7          | 1.83%        | 106         | 0         | 0%           | 102         | 2         | 1.96%        | 340            | 3          | 0.88%        |
| 35–39                              | 2090          | 227         | 10.86%        | 922           | 12         | 1.30%        | 367            | 10         | 2.72%        | 154         | 5         | 3.25%        | 51          | 0         | 0%           | 316            | 5          | 1.58%        |
| 40–44                              | 2136          | 314         | 14.70%        | 865           | 21         | 2.43%        | 294            | 19         | 6.46%        | 171         | 3         | 1.75%        | 23          | 0         | 0%           | 304            | 8          | 2.63%        |
| 45–49                              | 1893          | 330         | 17.43%        | 754           | 23         | 3.05%        | 253            | 20         | 7.91%        | 163         | 6         | 3.68%        | 25          | 0         | 0%           | 304            | 15         | 4.93%        |
| 50–54 with-<br>out risk<br>factors | 912           | 96          | 10.53%        | 351           | 6          | 1.71%        | 133            | 6          | 4.51%        | 71          | 2         | 2.82%        | 10          | 0         | 0%           | 152            | 3          | 1.97%        |
| 50–54 with<br>risk factors         | 837           | 227         | 27.12%        | 308           | 25         | 8.12%        | 102            | 7          | 0%           | 51          | 1         | 1.96%        | 13          | 0         | 0%           | 110            | 10         | 9.09%        |
| 55–59 with-<br>out risk<br>factors | 721           | 129         | 17.89%        | 313           | 8          | 2.56%        | 96             | 3          | 3.13%        | 60          | 2         | 3.33%        | 8           | 0         | 0%           | 108            | 5          | 4.63%        |
| 55–59 with<br>risk factors         | 807           | 248         | 30.73%        | 286           | 20         | 6.99%        | 75             | 14         | 0%           | 63          | 4         | 6.35%        | 12          | 1         | 8.33%        | 126            | 16         | 12.70%       |
| 60–64 <sup>1</sup>                 | 1022          | 275         | 26.91%        | 489           | 47         | 9.61%        | 116            | 18         | 15.52%       | 51          | 2         | 3.92%        | 11          | 0         | 0%           | 165            | 18         | 10.91%       |
| 65–69 <sup>1</sup>                 | 603           | 162         | 26.87%        | 369           | 41         | 11.11%       | 95             | 9          | 9.47%        | 66          | 6         | 9.09%        | 22          | 2         | 9.09%        | 114            | 26         | 22.81%       |
| 70–74 <sup>1</sup>                 | 392           | 103         | 26.28%        | 378           | 43         | 11.38%       | 79             | 7          | 8.86%        | 43          | 6         | 13.95%       | 15          | 1         | 6.67%        | 114            | 10         | 8.77%        |
| 75–79 <sup>1</sup>                 | 293           | 58          | 19.80%        | 414           | 47         | 11.35%       | 69             | 7          | 10.14%       | 45          | 4         | 8.89%        | 7           | 1         | 14.29%       | 101            | 16         | 15.84%       |
| 80–84 <sup>1</sup>                 | 194           | 45          | 23.20%        | 330           | 43         | 13.03%       | 59             | 3          | 5.08%        | 33          | 2         | 6.06%        | 4           | 1         | 25.00%       | 66             | 13         | 19.70%       |
| 85–89 <sup>1</sup>                 | 107           | 25          | 23.36%        | 266           | 39         | 14.66%       | 36             | 3          | 8.33%        | 17          | 2         | 11.76%       | 3           | 0         | 0%           | 55             | 5          | 9.09%        |
| 90–94 <sup>1</sup>                 | 35            | 6           | 17.14%        | 143           | 14         | 9.79%        | 18             | 2          | 11.11%       | 8           | 1         | 12.50%       | 5           | 1         | 20.00%       | 28             | 11         | 39.29%       |
| ≥95 <sup>1</sup>                   | 13            | 2           | 15.38%        | 43            | 7          | 16.28%       | 11             | 4          | 36.36%       | 4           | 0         | 0%           | 2           | 0         | 0%           | 9              | 4          | 44.44%       |
| <b>TOTAL</b>                       | <b>24,617</b> | <b>2807</b> | <b>11.40%</b> | <b>13,804</b> | <b>457</b> | <b>3.31%</b> | <b>4188</b>    | <b>169</b> | <b>4.04%</b> | <b>1993</b> | <b>57</b> | <b>2.86%</b> | <b>1172</b> | <b>16</b> | <b>1.37%</b> | <b>5126</b>    | <b>211</b> | <b>4.12%</b> |

<sup>1</sup> Target groups for seasonal influenza vaccination, according to Mexican guidelines.



**Table S7.3.** Estimated influenza cases by age group and season

| Age Group,<br>Years       | 2010–2011          | 2011–2012          | 2012–2013          | 2013–2014          | 2014–2015          | 2015–2016          | 2016–2017          | 2017–2018          | 2018–2019          | TOTAL             |
|---------------------------|--------------------|--------------------|--------------------|--------------------|--------------------|--------------------|--------------------|--------------------|--------------------|-------------------|
| 0–4                       | 1,541,921          | 526,212            | 1,991,434          | 1,417,562          | 1,794,872          | 1,275,233          | 1,268,274          | 2,197,168          | 1,476,442          | 13,489,116        |
| 5–11                      | 1,291,012          | 583,585            | 1,952,068          | 1,164,843          | 1,865,513          | 1,266,616          | 1,729,655          | 2,176,925          | 1,491,125          | 13,521,341        |
| 12–17                     | 1,100,268          | 496,595            | 1,658,823          | 989,697            | 1,586,659          | 1,080,209          | 1,480,577          | 1,869,632          | 1,283,742          | 11,546,202        |
| 18–49                     | 2,982,160          | 1,421,706          | 4,716,432          | 5,471,988          | 3,646,289          | 4,320,570          | 3,679,992          | 6,247,656          | 4,245,921          | 36,732,715        |
| 50–59                     | 777,680            | 312,180            | 1,308,217          | 1,445,898          | 1,267,128          | 1,259,132          | 1,581,055          | 2,928,240          | 1,515,030          | 12,394,559        |
| ≥60                       | 582,078            | 275,863            | 1,176,698          | 791,211            | 1,253,279          | 727,139            | 1,335,003          | 2,329,457          | 1,211,712          | 9,682,439         |
| <b>TOTAL</b>              | <b>8,275,119</b>   | <b>3,616,140</b>   | <b>12,803,672</b>  | <b>11,281,198</b>  | <b>11,413,739</b>  | <b>9,928,898</b>   | <b>11,074,556</b>  | <b>17,749,078</b>  | <b>11,223,972</b>  | <b>97,366,372</b> |
| <b>Population</b>         | <b>114,551,762</b> | <b>116,179,714</b> | <b>117,688,241</b> | <b>119,216,240</b> | <b>120,653,293</b> | <b>122,038,924</b> | <b>123,388,002</b> | <b>124,692,044</b> | <b>125,960,168</b> |                   |
| <b>Attack rate</b><br>(%) | <b>7.22</b>        | <b>3.11</b>        | <b>10.88</b>       | <b>9.46</b>        | <b>9.46</b>        | <b>8.14</b>        | <b>8.98</b>        | <b>14.23</b>       | <b>8.91</b>        |                   |

**Table S7.4. Lethality by age group and season**

| Age<br>Group,<br>Years | 2009–2010 | 2010–2011 | 2011–2012 | 2012–2013 | 2013–2014 | 2014–2015 | 2015–2016 | 2016–2017 | 2017–2018 | 2018–2019 | Average       |
|------------------------|-----------|-----------|-----------|-----------|-----------|-----------|-----------|-----------|-----------|-----------|---------------|
| <b>0–4</b>             | 1.83%     | 0.45%     | 3.43%     | 1.47%     | 5.48%     | 1.36%     | 4.61%     | 3.45%     | 2.16%     | 8.11%     | <b>3.13%</b>  |
| <b>5–11</b>            | 1.54%     | 0.00%     | 0.93%     | 0.44%     | 2.60%     | 0.97%     | 2.58%     | 1.52%     | 1.72%     | 0.00%     | <b>1.46%</b>  |
| <b>12–17</b>           | 1.95%     | 0.32%     | 1.25%     | 0.36%     | 2.39%     | 1.79%     | 1.58%     | 0.95%     | 2.26%     | 0.00%     | <b>1.42%</b>  |
| <b>18–49</b>           | 7.23%     | 0.92%     | 3.16%     | 1.93%     | 10.49%    | 2.94%     | 6.85%     | 8.36%     | 4.61%     | 7.87%     | <b>5.94%</b>  |
| <b>50–59</b>           |           |           |           |           |           |           |           |           |           |           |               |
| <b>without</b>         | 5.81%     | 0.50%     | 5.10%     | 1.69%     | 15.57%    | 4.71%     | 9.79%     | 12.24%    | 7.41%     | 6.25%     | <b>8.86%</b>  |
| <b>risk factors</b>    |           |           |           |           |           |           |           |           |           |           |               |
| <b>50–59 with</b>      |           |           |           |           |           |           |           |           |           |           |               |
| <b>risk factors</b>    | 20.16%    | 5.71%     | 17.74%    | 6.15%     | 28.26%    | 9.76%     | 24.88%    | 19.56%    | 16.60%    | 27.78%    | <b>20.54%</b> |
| <b>≥60</b>             | 9.45%     | 6.28%     | 18.32%    | 7.14%     | 23.72%    | 13.39%    | 19.05%    | 22.29%    | 14.47%    | 5.13%     | <b>17.40%</b> |
| <b>TOTAL</b>           | 6.29%     | 1.27%     | 4.66%     | 2.24%     | 12.13%    | 4.75%     | 8.98%     | 10.08%    | 6.48%     | 7.20%     | <b>7.30%</b>  |

Source: SISVEFLU

**Table S7.5.** Years of life lost per age group by season

| Age Group,<br>Years | 2009-2010   | 2010-2011   | 2011-2012   | 2012-2013   | 2013-2014     | 2014-2015   | 2015-2016     | 2016-2017     | 2017-2018   | 2018-2019  | Total         | %       |
|---------------------|-------------|-------------|-------------|-------------|---------------|-------------|---------------|---------------|-------------|------------|---------------|---------|
| 0-4                 | 366         | 151         | 1847        | 604         | 2831          | 458         | 3053          | 1408          | 1053        | 154        | <b>11,925</b> | 12.47%  |
| 5-11                | 284         | 0           | 460         | 132         | 1149          | 207         | 1656          | 664           | 549         | 0          | <b>5101</b>   | 5.33%   |
| 12-17               | 236         | 62          | 431         | 61          | 685           | 240         | 494           | 186           | 314         | 0          | <b>2709</b>   | 2.83%   |
| 18-49               | 4425        | 709         | 4479        | 1140        | 17,292        | 1596        | 10,715        | 7747          | 3128        | 247        | <b>51,478</b> | 53.84%  |
| 50-59               | 747         | 131         | 1498        | 215         | 5388          | 529         | 4319          | 2785          | 1198        | 131        | <b>16,941</b> | 17.72%  |
| ≥60                 | 154         | 115         | 716         | 144         | 1960          | 372         | 1697          | 1682          | 617         | 9          | <b>7466</b>   | 7.81%   |
| <b>TOTAL</b>        | <b>6212</b> | <b>1168</b> | <b>9431</b> | <b>2296</b> | <b>29,305</b> | <b>3402</b> | <b>21,934</b> | <b>14,472</b> | <b>6859</b> | <b>541</b> | <b>95,620</b> | 100.00% |

Source: SISVEFLU
